# Supplementary material for: Optimized 3D Finite-Difference-Time-Domain Algorithm to Model the Plasmonic Properties of Metal Nanoparticles with Near-Unity Accuracy
Source: MDPI journal article supplement (doi:10.3390/chemosensors9050114), 2021-05-20
Supplement: s1 [file s1]

# Optimized 3D Finite-Difference-Time-Domain Algorithm to Model the Plasmonic Properties of Metal Nanoparticles with Near-Unity Accuracy

Mehran Rafiee \*, Subhash Chandra, Hind Ahmed and Sarah J. McCormack

Department of Civil, Structural and Environmental Engineering, School of Engineering, Museum Building, Trinity College Dublin, The University of Dublin, Dublin 2 D02 PN40, Ireland; schandra@tcd.ie (S.C.); hahmed@tcd.ie (H.A.); mccorms1@tcd.ie (S.J.M.)

\* Correspondence: rafieem@tcd.ie; Tel.: +353-1-896-2670

## Supplementary Material: 3D FDTD Numerical Equations for Ag NP Modelling by Using Lorentz-Drude Fitting Terms

In a practical FDTD simulation, the Maxwell's equations are addressed by [1]:

$$\nabla \times \vec{H} = \vec{J} + \frac{\partial \vec{D}}{\partial t} \quad (1)$$

$$\nabla \times \vec{E} = -\frac{\partial \vec{B}}{\partial t}$$

$$\vec{D}(t) = \varepsilon(t) * \vec{E}(t)$$

$$\vec{B}(t) = \mu(t) * \vec{H}(t) \quad (S1)$$

Where  $\varepsilon(t)$  is permittivity in F/m and  $\mu(t)$  is permeability in H/m,  $D$  is electric flux density (also called dielectric displacement) in C/m<sup>2</sup>,  $B$  is magnetic flux density (also known as magnetic induction) in Wb/m<sup>2</sup>,  $H$  is the magnetic field intensity in A/m and  $E$  is electric field intensity in V/m.  $J$  is the material electric current density (A/m<sup>2</sup>) and can be obtained from material conductivity ( $\sigma$  (1/Ω)) by  $\vec{J} = \sigma \vec{E}$ .

By expanding these vector equations into scalar Equations [2], the complete 3D Maxwell's equations and constitutive relations are obtained in each axis. The final form of the update equations and constitutive relations for obtaining  $H$  field in only  $x$ -axis are:

$$H_x|_{t+\frac{\Delta t}{2}} = (m_{Hx1}|^{i,j,k})H_x|_{t-\frac{\Delta t}{2}} + (m_{Hx2}|^{i,j,k})C_x^E|_t^{i,j,k} + (m_{Hx3}|^{i,j,k})I_{CEx}|_t^{i,j,k} + (m_{Hx4}|^{i,j,k})I_{Hx}|_t^{i,j,k}$$

$$C_x^E|_t^{i,j,k} = \frac{E_z|_t^{i,j+1,k} - E_z|_t^{i,j,k}}{\Delta y} - \frac{E_y|_t^{i,j,k+1} - E_y|_t^{i,j,k}}{\Delta z}$$

$$I_{Hx}|_{t=\frac{\Delta t}{2}}^{i,j,k} = \sum_{T=\frac{\Delta t}{2}}^{t-\frac{\Delta t}{2}} H_x|_T^{i,j,k}$$

$$I_{CEx}|_t^{i,j,k} = \sum_{T=0}^t C_x^E|_T^{i,j,k}$$

$$m_{Hx0}|^{i,j,k} = \frac{1}{\Delta t} + \left( \frac{(\sigma_y^H|^{i,j,k} + \sigma_z^H|^{i,j,k})}{2\varepsilon_0} \right) + \frac{(\sigma_y^H|^{i,j,k})(\sigma_z^H|^{i,j,k})\Delta t}{4\varepsilon_0^2}$$

$$m_{Hx1}|^{i,j,k} = \frac{1}{m_{Hx0}|^{i,j,k}} \left[ \frac{1}{\Delta t} - \left( \frac{(\sigma_y^H|^{i,j,k} + \sigma_z^H|^{i,j,k})}{2\varepsilon_0} \right) - \frac{(\sigma_y^H|^{i,j,k})(\sigma_z^H|^{i,j,k})\Delta t}{4\varepsilon_0^2} \right]$$

$$m_{Hx2}|^{i,j,k} = -\frac{1}{m_{Hx0}|^{i,j,k}} \frac{c_0}{\mu_{xx}|^{i,j,k}}$$

$$m_{Hx3}|^{i,j,k} = -\frac{1}{m_{Hx0}|^{i,j,k}} \frac{c_0 \Delta t}{\varepsilon_0} \frac{\sigma_x^H|^{i,j,k}}{\mu_{xx}|^{i,j,k}}$$

$$m_{Hx4}|^{i,j,k} = -\frac{1}{m_{Hx0}|^{i,j,k}} \frac{\Delta t}{\varepsilon_0^2} (\sigma_y^H|^{i,j,k}) (\sigma_z^H|^{i,j,k})$$

The final form of the update equations and constitutive relations for  $D$  in x-axis are:

$$\begin{aligned} D_x|_{t+\Delta t}^{i,j,k} &= (m_{Dx1}|^{i,j,k}) D_x|_t^{i,j,k} + (m_{Dx2}|^{i,j,k}) C_x^H|_{t+\frac{\Delta t}{2}}^{i,j,k} + (m_{Dx3}|^{i,j,k}) I_{CHx}|_{t-\frac{\Delta t}{2}}^{i,j,k} + (m_{Dx4}|^{i,j,k}) I_{Dx}|_{t-\Delta t}^{i,j,k} \\ C_x^H|_{t+\frac{\Delta t}{2}}^{i,j,k} &= \frac{H_z|_{t+\frac{\Delta t}{2}}^{i,j,k} - H_z|_{t+\frac{\Delta t}{2}}^{i,j-1,k}}{\Delta y} - \frac{H_y|_{t+\frac{\Delta t}{2}}^{i,j,k} - H_y|_{t+\frac{\Delta t}{2}}^{i,j,k-1}}{\Delta z} \\ I_{Dx}|_t^{i,j,k} &= \sum_{T=0}^t D_x|_T^{i,j,k} \\ I_{CHx}|_{t-\frac{\Delta t}{2}}^{i,j,k} &= \sum_{T=\frac{\Delta t}{2}}^{t-\frac{\Delta t}{2}} C_x^H|_T^{i,j,k} \\ m_{Dx0}|^{i,j,k} &= \frac{1}{\Delta t} + \left( \frac{\sigma_y^D|^{i,j,k} + \sigma_z^D|^{i,j,k}}{2\varepsilon_0} \right) + \frac{(\sigma_y^D|^{i,j,k})(\sigma_z^D|^{i,j,k})\Delta t}{4\varepsilon_0^2} \\ m_{Dx1}|^{i,j,k} &= \frac{1}{m_{Dx0}|^{i,j,k}} \left[ \frac{1}{\Delta t} - \left( \frac{\sigma_y^D|^{i,j,k} + \sigma_z^D|^{i,j,k}}{2\varepsilon_0} \right) - \frac{(\sigma_y^D|^{i,j,k})(\sigma_z^D|^{i,j,k})\Delta t}{4\varepsilon_0^2} \right] \\ m_{Dx2}|^{i,j,k} &= \frac{c_0}{m_{Dx0}|^{i,j,k}} \\ m_{Dx3}|^{i,j,k} &= \frac{1}{m_{Dx0}|^{i,j,k}} \frac{c_0 \Delta t}{\varepsilon_0} \frac{\sigma_x^D|^{i,j,k}}{\varepsilon_0} \\ m_{Dx4}|^{i,j,k} &= -\frac{1}{m_{Dx0}|^{i,j,k}} \frac{\Delta t}{\varepsilon_0^2} (\sigma_y^D|^{i,j,k}) (\sigma_z^D|^{i,j,k}) \end{aligned} \tag{A3}$$

Afterwards, the final form of the update equations and constitutive relations for  $E$  field in x-axis are:

$$\begin{aligned} E_x|_{t+\Delta t}^{i,j,k} &= (m_{Ex1}|^{i,j,k}) E_x|_t^{i,j,k} \\ m_{Ex1}|^{i,j,k} &= \frac{1}{\varepsilon_{xx}|^{i,j,k}} \end{aligned} \tag{A4}$$

By using the same interoperation, the final form of the update equations and constitutive relations for other axis ( $y$  and  $z$ ) can also be achieved. Note that, in the above equations, the terms are defined in 3D matrices in which  $i, j$  and  $k$  indicates the grid cell location (in  $x, y$  and  $z$  vectors respectively) in a 3D Yee grid. “ $m$ ” terms are constitutive relations. “ $\sigma$ ” terms are including all conductivity and loss values in the grid. “ $I$ ” terms are integration terms which are the summation of curl ( $C$ ) terms.  $\Delta t$  is the time step in second which is depended to the grid resolutions and calculated based on the Courant stability condition [3]:

$$\Delta t \leq \frac{1}{c_0 \sqrt{\frac{1}{(\Delta x)^2} + \frac{1}{(\Delta y)^2} + \frac{1}{(\Delta z)^2}}} \tag{A5}$$

Where  $c_0$  is the speed of the light in the medium in m/s.  $\Delta x, \Delta y$  and  $\Delta z$  are grid discretization ( $\Delta d$ ) in  $x, y$  and  $z$  vectors in meter which are calculated by:

$$\Delta d = \frac{\lambda_{min}}{N_\lambda} \quad (A6)$$

Where  $N_\lambda$  is grid resolution and  $\lambda_{min}$  is the shortest wavelength of the irradiated input spectrum obtaining by using the maximum refraction index inside the medium ( $\eta_{max}$ ) and highest frequency of the irradiated input spectrum ( $f_c$ ) as follows:

$$\lambda_{min} = \frac{c}{f_c \eta_{max}} \quad (A7)$$

While updating Maxwell's equations, the input source radiation spectrum is added to the system. The incident electric field of the source radiation spectrum is only polarised in  $x$ - $y$  plane [1]; therefore, it is imported to grid as:

$$\begin{aligned} E_x^{src}|_t^{i,j,k_{src}} &= P_x \cos(\omega t - k_0 \eta_{inc} z) \\ E_y^{src}|_t^{i,j,k_{src}} &= P_y \cos(\omega t - k_0 \eta_{inc} z) \end{aligned} \quad (A8)$$

Where P terms are calculating from the polarization vector ( $\vec{P} = \vec{P}_x + \vec{P}_y$ ),  $k_0 = \frac{2\pi}{\lambda_0}$ , is the radiation's free space wavelength which is constant and  $\eta_{inc}$  is the refraction index of the incident source perimeter. The incident source magnetic field is achieved by using the Maxwell's curl equation ( $\nabla \times \vec{E} = -\mu \frac{\partial \vec{H}}{\partial t}$ ) and is defined as:

$$\begin{aligned} H_x^{src}|_t^{i,j,k_{src}} &= -P_y \sqrt{\frac{\epsilon_{inc}}{\mu_{inc}}} \cos(\omega t - k_0 \eta_{inc} z) \\ H_y^{src}|_t^{i,j,k_{src}} &= P_x \sqrt{\frac{\epsilon_{inc}}{\mu_{inc}}} \cos(\omega t - k_0 \eta_{inc} z) \end{aligned} \quad (A9)$$

In the updating process of Maxwell's equations, the permittivity can be interpreted differently for various materials. Linear isotropic materials don't show spatial and temporal dispersion; therefore, their permittivity is defined as a constant number called dielectric constant. However, the optical response of real anisotropic materials; such as MNPs, clearly depends on frequency and wave vector; thus, their dispersive properties are described by complex dielectric function ( $\tilde{\epsilon}_r(\omega)$ ). The measured dielectric function of Ag NPs was reported by Johnson and Christy [4] which can be mathematically fitted by Lorentz-Drude Model [5]:

$$\tilde{\epsilon}_r(\omega) = \epsilon_r(\infty) + \sum_{m=1}^N \frac{f_m \omega_p^2}{\omega_{0,m}^2 + j\Gamma_m \omega - \omega^2} \quad (A10)$$

Where  $\omega$  is frequency,  $N$  is the number of resonators,  $f_m$  is the strength of the resonator "m",  $\omega_{0,m}$  is the natural frequency of the resonator "m" and  $\Gamma_m$  is the damping rate of the of the resonator "m".  $\epsilon_r(\infty)$  is the offset value of permittivity of the host material in which the metal is solved. Table A.1 presents Lorentz-Drude parameters for Ag NPs.

Table S1. Lorentz-Drude parameters for Ag NPs [5].

|                               | $\omega_p = 9.01 \text{ ev}$ | $\epsilon_r(\infty) = 1 \text{ F/m}$ |  |
|-------------------------------|------------------------------|--------------------------------------|--|
| $\omega_0 = 0 \text{ ev}$     | $f_0 = 0.84$                 | $\Gamma_0 = 9.01 \text{ ev}$         |  |
| $\omega_1 = 0.816 \text{ ev}$ | $f_1 = 0.065$                | $\Gamma_1 = 0.053 \text{ ev}$        |  |
| $\omega_2 = 4.481 \text{ ev}$ | $f_2 = 0.124$                | $\Gamma_2 = 3.886 \text{ ev}$        |  |
| $\omega_3 = 8.185 \text{ ev}$ | $f_3 = 0.011$                | $\Gamma_3 = 0.065 \text{ ev}$        |  |
| $\omega_4 = 9.083 \text{ ev}$ | $f_4 = 0.84$                 | $\Gamma_4 = 0.916 \text{ ev}$        |  |
| $\omega_5 = 20.29 \text{ ev}$ | $f_5 = 5.646$                | $\Gamma_5 = 2.419 \text{ ev}$        |  |

## References:

1. Taflove A, Hagness SC (2005) Computational electrodynamics: the finite-difference time-domain method. Artech house,

2. Taflov A, Hagness SC (1995) Computational electrodynamics: the finite-difference time-domain method. Norwood, 2nd Edition, MA: Artech House, 1995
3. Courant R, Friedrichs K, Lewy H (1967) On the partial difference equations of mathematical physics. IBM journal 11 (2):215-234
4. Johnson PB, Christy R-W (1972) Optical constants of the noble metals. Physical review B 6 (12):4370
5. Schneider JB (2010) Understanding the finite-difference time-domain method. School of electrical engineering and computer science Washington State University–URL: <http://www.Eecs.Wsu.Edu/~schneidj/ufdtd/>(request data: 2911 2012)
