# Supplementary material for: Optimized 3D Finite-Difference-Time-Domain Algorithm to Model the Plasmonic Properties of Metal Nanoparticles with Near-Unity Accuracy
Source: MDPI journal article supplement (doi:10.3390/chemosensors9050114), 2021-05-20
Supplement: s1 [file s1]

Archive with 1 entries (1 files):
- chemosensors-1196523-supplementary.pdf
